# Supplementary material for: Piceatannol inhibits the IL-1β-induced inflammatory response in human osteoarthritic chondrocytes and ameliorates osteoarthritis in mice by activating Nrf2
Source: Royal Society of Chemistry journal article supplement (doi:10.1039/c7fo00822h), 2017-01-01
Supplement: c7fo00822h1.pdf [file c7fo00822h1.pdf]

**Supplementary Figure 1:** Effects of piceatannol alone on the expression of iNOS, COX-2, Collagen II, MMP13 and Nrf2 in chondrocytes.
