# Supplementary material for: Piceatannol inhibits the IL-1β-induced inflammatory response in human osteoarthritic chondrocytes and ameliorates osteoarthritis in mice by activating Nrf2
Source: Royal Society of Chemistry journal article supplement (doi:10.1039/c7fo00822h), 2017-01-01

**A**

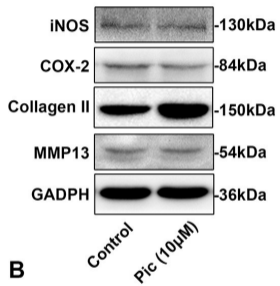

**B**

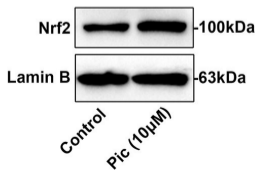

**C**

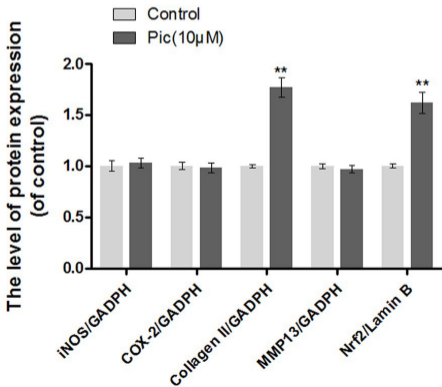

Supplement: c7fo00822h2.pdf [file c7fo00822h2.pdf]
